# Supplementary material
Source: publisher site journal article supplement (https://www.dovepress.com/article/503300)
Supplement: Supplementary file 1 [file get_supplementary_file.php]

**Fresh Hope Care phrases**

| **Food & Drink: Care staff** | |
| --- | --- |
| **Question / statement** | **Response** |
| Are you hungry? | Yes I am / no, I’m not / A little bit |
| Would you like something to eat? | Yes please / No thanks / later / not now |
| What would you like? | Food names: |
| Snacks: Some cake? / A biscuit? | Yes I am / no, I’m not / A little bit |
| Some fruit?: an apple? a banana? an orange? etc |  |
| Would you like some lunch? | Yes please / No thanks / later / not now |
| What would you like for lunch? | Meal names: |
| Would you like some breakfast? | Yes please / No thanks / later / not now |
| What would you like for breakfast? | Meal names |
| Would you like some dinner? | Yes please / No thanks / later / not now |
| What would you like for dinner? | Meal names: |
| Are you thirsty? |  |
| Would you like something to drink? |  |
| What would you like? |  |
| Drink names: |  |
| What’s your favourite food? |  |
| What don’t you like? |  |

| **Food & Drink: Resident** | |
| --- | --- |
| **Question / statement** | **Response** |
| Can I have a shower? |  |
| I need to use the bathroom |  |
| I’m a bit hungry. |  |
| Can I have something to eat? |  |
| I’m a bit thirsty. |  |
| Can I have something to drink? |  |
| Can I have some water, please? |  |
| Can I have some juice, please? |  |
| Can I have a cup of tea, please? |  |
| Can I have a cup of coffee, please? |  |
|  |  |

| **Daily routine: Care staff** | |
| --- | --- |
| **Question / statement** | **Response** |
| Are you ready to get up? | Yes, please / not yet / a little later |
| Would you like a shower? | Yes please / No thanks / later / not now |
| Do you want to go to the toilet? | Yes please / No thanks |
| Have you had a bowel movement? | Yes / no |
| Have you passed urine? | Yes / no |
| Are you ready to get up? | Yes please / No thanks / later / not now |
| What would you like to wear today? |  |
| Are you ready? | Yes please / No thanks / later / not now |
| Do you want to go into the day room? | Yes please / No thanks / later / not now |
| Do you want to go outside? | Yes please / No thanks / later / not now |
| Are you tired? | Yes / no |
| Would you like to go to sleep? | Yes please / No thanks / later / not now |
| Are you hot? | Yes / no |
| Do you want me to open the window? | Yes please / No thanks |
| Do you want me to close the window? | Yes please / No thanks |
| Are you cold? | Yes / no |
| Do you want a blanket? | Yes please / No thanks |
| Do you want a jumper? |  |
| You look great today! |  |
| It’s a lovely day today. |  |
| It’s a bit cold today. |  |

| **Daily routine: Residents** | |
| --- | --- |
| **Question / statement** | **Response** |
| Could you help me get up? | Sure / no problem |
| Can I have a shower? |  |
| I need to go to the toilet? |  |
| I need to have a bowel movement |  |
| I need to pass urine |  |
| I’d like to wear … |  |
| Can I go into the day room? |  |
| Can I go outside? |  |
| I’m tired |  |
| I would like to go to bed? |  |
| I’m hot |  |
| Can you open the window? |  |
| Can you close the window? |  |
| I’m cold |  |
| Could you get me a blanket? |  |

**Phrases for New residents**

| **Family: Care staff** (Read phrase in English audio in target language) | | |
| --- | --- | --- |
| **Question / statement** | **Written** (Language) | **Response** |
| Where were you born? |  | Use combination of yes/no; gestures; and images (eg family members) |
| When did you come to Australia? |  |
| Are you married? |  |
| Do you have any children? |  |
| How many? How many boys/girls |  |
| Have you got any grandchildren? |  |
| Where does your daughter/son live? |  |
| Would you like to call your family? |  |
| What is your favourite hobby /pastime? |  | Images of activities |

| **Food & Drink: Care staff** (Read phrase in English audio in target language) | | |
| --- | --- | --- |
| **Question / statement** | **Written** (Language) | **Response** |
| Are you hungry? |  | Yes/no |
| Would you like something to eat? |  | Yes/no |
| What would you like? |  | images |
| Some cake? |  | Yes/no |
| A biscuit? |  | Yes/no |
| Some fruit? |  | Yes/no |
| Would you like some lunch? |  | Yes/no |
| What would you like for lunch? |  | images |
| Would you like some breakfast? |  | Yes/no |
| What would you like for breakfast? |  | images |
| Would you like some dinner? |  | Yes/no |
| What would you like for dinner? |  | Yes/no |
| Are you thirsty? |  | Yes/no |
| Would you like something to drink? |  | Yes/no |
| What would you like? |  | images |
| What’s your favourite food? |  | images |
| What don’t you like? |  | images |

| **Food & Drink: Resident** (read phrase in target lang audio in English) | | |
| --- | --- | --- |
| **Question / statement** | **Written** (Language) | **Response** |
| Can I have a shower? |  | Carers respond as appropriate |
| I need to use the bathroom. |  |
| I’m a bit hungry. Can I have something to eat? |  |
| I’m a bit thirsty. Can I have something to drink? |  |
| Can I have some water, please? |  |
| Can I have some juice, please? |  |
| Can I have a cup of tea, please? |  |
| Can I have a cup of coffee, please? |  |

| **Daily routine: Care staff** (Read phrase in English audio in target language) | | |
| --- | --- | --- |
| **Question / statement** | **Written** (Language) | **Response** |
| Are you ready to get up? |  | Yes/no |
| Would you like a shower? |  | Yes/no |
| Do you want to go to the toilet? |  | Yes/no |
| Have you had a bowel movement? |  | Yes/no |
| Have you passed urine? |  | Yes/no |
| Are you ready to get up? |  | Yes/no |
| What would you like to wear today? |  | Use images |
| Are you ready? |  | Yes/no |
| Do you want to go into the day room? (**note:** main room in the centre) |  | Yes/no |
| Do you want to go outside? |  | Yes/no |
| Are you tired? |  | Yes/no |
| Would you like to go to sleep? |  | Yes/no |
| Are you hot? |  | Yes/no |
| Do you want me to open the window? |  | Yes/no |
| Do you want me to close the window? |  | Yes/no |
| Are you cold? |  | Yes/no |
| Do you want a blanket? |  | Yes/no |
| Do you want a jumper? |  | Yes/no |
| You look great today! |  | n/a |
| It’s a lovely day today. |  | n/a |
| It’s a bit cold today. |  | n/a |

| **Daily routine: Residents** (read phrase in target lang audio in English) | | |
| --- | --- | --- |
| **Question / statement** | **Written** (Language) | **Response** |
| Could you help me get up? |  | Carers reply as appropriate  Images of clothes |
| Can I have a shower? |  |
| I need to go to the toilet? |  |
| I need to have a bowel movement |  |
| I need to pass urine |  |
| I’d like to wear … |  |
| Can I go into the day room? |  |
| Can I go outside? |  |
| I’m tired |  |
| I would like to go to bed. |  |
| I’m hot. |  |
| Can you open the window? |  |
| Can you close the window? |  |
| I’m cold |  |
| Could you get me a blanket? |  |

| **Interests: Care staff** (Read phrase in English audio in target language) | | |
| --- | --- | --- |
| **Question / statement** | **Written** (Language) | **Response** |
| Would you like to listen to some music? |  | Yes / No  images |
| Would you like to watch TV? |  |
| Would you like to play bingo? |  |
| Do you want to play cards? |  |
| Do you want to … |  |

| **Interests: Resident** (read phrase in target lang audio in English) | | |
| --- | --- | --- |
| **Question / statement** | **Written** (Language) | **Response** |
| I would like to listen to some music |  | Carers reply as appropriate |
| I would you like to watch TV |  |
| I would you like to play bingo |  |
| Can I play cards? |  |
| Can I … |  |

| **Feelings: Care staff** (Read phrase in English audio in target language) | | |
| --- | --- | --- |
| **Question / statement** | **Written** (Language) | **Response** |
| How do you feel? |  | gesture |
| Where does it hurt? |  | point |
| Have you had your medicine? |  | Yes/No |

| **Feelings: Residents.** (read phrase in target lang audio in English) | | |
| --- | --- | --- |
| **Question / statement** | **Written** (Language) | **Response** |
| I feel happy. |  |  |
| I feel great. |  |  |
| I don’t feel very well. |  |  |
| I feel sick. |  |  |
| I’m going to be sick. |  |  |
| I’ve got a bit of a cold |  |  |
| I’ve got a headache |  |  |
| My leg hurts |  |  |
| My back hurts |  |  |
| I need my medicine |  |  |
| I haven’t had my medicine. |  |  |

| **Every day communication: Care staff** (Read phrase in English audio in target language) | | |
| --- | --- | --- |
| **Question / statement** | **Written** (Language) | **Response** |
| Could you please repeat that? |  | As appropriate |
| Can you please write that down? |  |
| Can you read what I wrote down for you? |  |
| Stand up, please. |  |
| Sit down, please. |  |
| Shall we go out/in? |  | Yes/no |
| Have you had enough? |  | Yes/no |
| Would you like some more? |  | Yes/no |
| Are you OK? |  | Yes/no |

| **Medical emergency: Care staff/doctor** (Read phrase in English audio in target language) | | |
| --- | --- | --- |
| **Question / statement** | **Written** (Language) | **Response** |
| Are you able to swallow? |  |  |
| Are you dizzy? |  |  |
| Can you hear me? |  |  |
| Can you lie down? |  |  |
| Can you lift your feet? |  |  |
| Can you lift your hand? |  |  |
| Can you stand up? |  |  |
| Do you have a sore throat |  |  |
| Do you have a sore tooth? |  |  |
| Do you have a chest pain? |  |  |
| Do you have diarrhea |  |  |
| Do you have shortness of breath? |  |  |
| Have you been coughing? |  |  |
| Have you had anything to drink? |  |  |
| Have you vomited? |  |  |
| Where is the pain? |  |  |
| Where is the swelling? |  |  |

**Phrases for the carers section for English practice**

| **Food & Drink: Care staff** | |
| --- | --- |
| **Question / statement** | **Response** |
| Are you hungry? | Yes, I am / not really |
| Would you like something to eat? | Yes please / No thanks / later / not now |
| What would you like? | I’d love a biscuit. |
| Would you like some cake? | Just a small bit |
| Do you want a biscuit? | Yes please / No thanks |
| Would you like some fruit? | I’m not really hungry |
| Would you like an apple? | I don’t like apples. |
| Are you ready for some lunch? | Yes, I am |
| How about some lunch? | Not now, I’m not really hungry |
|  | Yes please / No thanks / later / not now |
| What would you like for lunch? | I’ll have the chicken, thanks? |
| Would you like some breakfast? | Yes please |
| What would you like for breakfast? | Can I have some cereal / I’ll just have some toast |
| Would you like some dinner? | Yes please / No thanks / later / not now |
| Are you thirsty? | Hugh? |
| Want a drink? |  |
| Would you like something to drink? | Yes, please |
| What would you like? | Could I have some juice |
| Would you like to listen to some music? |  |
| Do you want to watch TV? |  |
| Would you like to play bingo? |  |
| Do you want to play cards? |  |
| How would you like to go outside? |  |
| What is your favourite hobby? |  |

| **Daily routine: Care staff** | |
| --- | --- |
| **Question / statement** | **Response** |
| Are you ready to get up? | Yes, please / not yet / a little later |
| Would you like a shower? | Yes please / not now |
| Do you want to go to the toilet? | Yes, please / No thanks |
| Have you been to the toilet? | Yes / no |
| Are you ready to get up? | Yes please / No thanks / later / not now |
| What would you like to wear today? | My red dress / my grey trousers / my blue shirt /my white blouse/ the black skirt / my grey jacket /my orange cardigan /my woollen jumper |
| Are you ready? | Yes please / No thanks / later / not now |
| Do you want to go into the day room? | Yes please / No thanks / later / not now |
| Do you want to go outside? | Yes please / No thanks / later / not now |
| Are you tired? | Yes / no |
| Are you ready to go to bed? | Yes please / No thanks / later / not now |
| Are you hot? | Yes / no |
| Do you want me to open the window? | Yes please / No thanks |
| Do you want me to close the window? | Yes please / No thanks |
| Are you cold? | Yes / no |
| Do you want a blanket? | Yes please / No thanks |
| Do you want a jumper? |  |
| Let’s go outside |  |
| Have you had enough? |  |
| Would you like some more? |  |
| You look great today! |  |
| It’s a lovely day today. |  |
| It’s a bit cold today. |  |
| How are you feeling? |  |
| What are you looking for? |  |
| Would you like your glasses / specs? |  |
| Want to sit down? |  |
| Ready to stand up? |  |
| Where are your hearing aids? |  |
| Wait there, I’ll get your walker / stick / wheelchair? |  |
| Which book would you like? |  |
| Would you like the paper? |  |
| What channel do you want? |  |
| Where’s the remote? |  |
| Do you want the heater on? |  |
| Do you want the aircon / fan on? |  |
|  |  |

| **Asking what : Care staff** | |
| --- | --- |
| **Question / statement** | **Response** |
| Would you like to listen to some music? | Yes please / No thanks / later / not now |
| Would you like to watch TV? |
| Would you like to play bingo? |
| Do you want to play cards? |
| Do you want to … |
| What is your favourite hobby /pastime? |  |
|  |  |

| **Interests: Resident** | |
| --- | --- |
| **Question / statement** | **Response** |
| I would like to listen to some music | Sure /no problem |
| I would you like to watch TV |
| I would you like to play bingo |
| Can I play cards? |
| Can I … |
| I like … (cooking, gardening, knitting, … |  |
| I don’t like .. |  |

| **Feelings: Care staff** | |
| --- | --- |
| **Question / statement** | **Response** |
| How do you feel? |  |
| Where does it hurt? |  |
| Have you had your medicine? |  |
|  |  |

| **Feelings: Residents** | |
| --- | --- |
| **Question / statement** | **Response** |
| I feel happy. |  |
| I feel great. |  |
| I don’t feel very well. |  |
| I feel sick. |  |
| I’m going to be sick. |  |
| I’ve got a bit of a cold |  |
| I’ve got a headache |  |
| My leg hurts |  |
| My back hurts |  |
| I need my medicine |  |
| I haven’t had my medicine. |  |

| **Family:Care staff** | |
| --- | --- |
| **Question / statement** | **Response** |
| Where were you born? | I was born in .. |
| When did you come to Australia? |  |
| Are you married? |  |
| Do you have any children? | Yes / yes I have ... children /no (I don’t have any) |
| How many? How many boys/girls |  |
| Have you got any grandchildren? |  |
| Where does your daughter/son live? |  |
|  |  |

| **Every day communication: Care staff** | |
| --- | --- |
| **Question / statement** | **Response** |
| Could you please repeat that? | Sure /no problem |
| Can you please write that down? |
| Can you read what I wrote down for you? |
| Stand up, please. |
| Sit down, please. |
| Shall we go out/in? |  |
| Have you had enough? |  |
| Would you like some more? |  |
| Are you OK? |  |

Loved ones:

I would like to call my daughter/son etc. / Would you like to call…

When is my loved one coming?

Personal history:

Would you like to look at your pictures? I would like to look at my pictures.

I am from (insert home country)/ Are you from (insert home country)?

Do you speak…?

I have …. Children
